# Supplementary material
Source: publisher figshare collection journal article supplement (https://acs.figshare.com/ndownloader/files/21936522)
Supplement: Supplementary file 1 [file 21936522]

# **Non-target Discovery of Per- and Polyfluoroalkyl Substances in Atmospheric Particulate Matter and Gaseous Phase Using Cryogenic Air Sampler**

*Nanyang Yu<sup>†</sup>, Haozhe Wen<sup>†</sup>, Xuebing Wang<sup>†</sup>, Eriko Yamazaki<sup>‡</sup>, Sachi Taniyasu<sup>‡</sup>,  
Nobuyoshi Yamashita<sup>‡</sup>, Hongxia Yu<sup>†</sup> and Si Wei<sup>†\*</sup>*

<sup>†</sup>State Key Laboratory of Pollution Control and Resource Reuse, School of the Environment, Nanjing University, Nanjing, People's Republic of China

<sup>‡</sup>National Institute of Advanced Industrial Science and Technology (AIST), Tsukuba, Ibaraki, 305-8569, Japan

\*Phone: +86 25 8968 0356; fax: +86 25 8968 0356; e-mail: [weisi@nju.edu.cn](mailto:weisi@nju.edu.cn) (S.W.).

Number of pages: 31

Number of Tables: 7

Number of Figures: 12

## Contents

|                                                                                                                                        |                 |
|----------------------------------------------------------------------------------------------------------------------------------------|-----------------|
| <b>Section 1. Chemicals and Reagents</b>                                                                                               | <b>Page S3</b>  |
| <b>Table S1.</b> The compound name, abbreviations, molecular formula, supplier and purity of standards                                 | <b>Page S4</b>  |
| <b>Section 2. Sample Preparation</b>                                                                                                   | <b>Page S5</b>  |
| <b>Table S2.</b> The Specification, precondition and elution solution of SPE cartridges                                                | <b>Page S6</b>  |
| <b>Section 3. UPLC-HRMS Analysis</b>                                                                                                   | <b>Page S7</b>  |
| <b>Table S3.</b> Mobile phase gradient elution condition                                                                               | <b>Page S8</b>  |
| <b>Table S4.</b> The procedural recovery (20 µg L <sup>-1</sup> ) and the sensitivity of UPLC-HRMS analysis with known PFASs standards | <b>Page S9</b>  |
| <b>Section 4. Non-target Screening and Identification of PFASs</b>                                                                     | <b>Page S10</b> |
| <b>Table S5.</b> The identified PFASs with level 4 or above                                                                            | <b>Page S12</b> |
| <b>Table S6.</b> The CAS number, IUPAC name and SMILE for the identified PFASs with level 1 and level 2                                | <b>Page S15</b> |
| <b>Figure S1.</b> Identification of PFOA (m/z 412.96643)                                                                               | <b>Page S17</b> |
| <b>Figure S2.</b> Identification of PFOS (m/z 498.93021)                                                                               | <b>Page S18</b> |
| <b>Figure S3.</b> Identification of 6:2 FTS (m/z 426.96791)                                                                            | <b>Page S19</b> |
| <b>Figure S4.</b> Identification of 6:2 Cl-PFESA (m/z 530.89558)                                                                       | <b>Page S20</b> |
| <b>Figure S5.</b> Identification of 6:2 diPAP (m/z 788.97505)                                                                          | <b>Page S21</b> |
| <b>Figure S6.</b> Identification of H-PFCA                                                                                             | <b>Page S22</b> |
| <b>Figure S7.</b> Identification of G03 (m/z 532.92540) in Class 7                                                                     | <b>Page S23</b> |

|                                                                           |                 |
|---------------------------------------------------------------------------|-----------------|
| <b>Figure S8.</b> Extract ion chromatogram G01 (m/z 432.93179) in Class 7 | <b>Page S24</b> |
| <b>Figure S9.</b> Identification of H04 (m/z 698.91074) in Class 8        | <b>Page S25</b> |
| <b>Figure S10.</b> Identification of I02 (m/z 714.90565) in Class 9       | <b>Page S26</b> |
| <b>Figure S11.</b> Identification of J02 (m/z 758.87102) in Class 10      | <b>Page S27</b> |
| <b>Figure S12.</b> Isotope distribution of K02 (m/z 824.9036) in Class 11 | <b>Page S28</b> |
| <b>Table S7.</b> Potential PFASs homologues found as Level 5              | <b>Page S29</b> |
| <b>References</b>                                                         | <b>Page S31</b> |

## **Section 1.** Chemicals and Reagents.

Formic acid (HPLC grade, purity: 99%) and ammonium hydroxide solution ~25% (HPLC grade) was purchased from ROE SCIENTIFIC INC (USA). Ammonium acetate (HPLC grade) was purchased from CNW technologies GmbH (Duesseldorf, Germany). Water (LCMS, purity> 99.99%) was purchased from Fisher (USA). Methanol (HPLC grade, purity: 99.9%) was purchased from Merck (Germany). The detail information of standards is shown in **Table S1**.

**Table S1.** The compound name, abbreviations, molecular formula, supplier and purity of standards.

| Compound name                                                                                      | Abbreviation       | Molecular formula                                              | Supplier                | Purity |
|----------------------------------------------------------------------------------------------------|--------------------|----------------------------------------------------------------|-------------------------|--------|
| Perfluorobutane sulfonate                                                                          | PFBS               | C <sub>4</sub> HF <sub>9</sub> O <sub>3</sub> S                | Woke                    | 98%    |
| Perfluorohexane sulfonate                                                                          | PFH <sub>x</sub> S | C <sub>6</sub> HF <sub>13</sub> O <sub>3</sub> S               | Sigma-Aldrich           | 98%    |
| n-perfluoro-1-octanesulfonate                                                                      | PFOS               | C <sub>8</sub> HF <sub>17</sub> O <sub>3</sub> S               | Wellington Laboratories | 98%    |
| Perfluoropentanoate                                                                                | PFPeA              | C <sub>5</sub> HF <sub>9</sub> O <sub>2</sub>                  | Sigma-Aldrich           | 97%    |
| Perfluorohexanoate                                                                                 | PFH <sub>x</sub> A | C <sub>6</sub> HF <sub>11</sub> O <sub>2</sub>                 | Sigma-Aldrich           | 97%    |
| Perfluoroheptanoate                                                                                | PFHpA              | C <sub>7</sub> HF <sub>13</sub> O <sub>2</sub>                 | Sigma-Aldrich           | 99%    |
| Perfluorooctanoate                                                                                 | PFOA               | C <sub>8</sub> HF <sub>15</sub> O <sub>2</sub>                 | Alfa Aesar              | 95%    |
| Perfluorononanoate                                                                                 | PFNA               | C <sub>9</sub> HF <sub>17</sub> O <sub>2</sub>                 | Alfa Aesar              | 97%    |
| Perfluorodecanoate                                                                                 | PFDA               | C <sub>10</sub> HF <sub>19</sub> O <sub>2</sub>                | Sigma-Aldrich           | 98%    |
| Perfluoroundecanoate                                                                               | PFUnDA             | C <sub>11</sub> HF <sub>21</sub> O <sub>2</sub>                | Sigma-Aldrich           | 95%    |
| Perfluorododecanoate                                                                               | PFDoDA             | C <sub>12</sub> HF <sub>23</sub> O <sub>2</sub>                | Sigma-Aldrich           | 95%    |
| Perfluorotridecanoate                                                                              | PFTTrDA            | C <sub>13</sub> HF <sub>25</sub> O <sub>2</sub>                | Sigma-Aldrich           | 97%    |
| Perfluorotetradecanoate                                                                            | PFTeDA             | C <sub>14</sub> HF <sub>27</sub> O <sub>2</sub>                | Sigma-Aldrich           | 97%    |
| 2-(6-Chloro-1,1,2,2,3,3,4,4,5,5,6,6-dodecafluorohexoxy)-<br>1,1,2,2-tetrafluoroethanesulfonic acid | 6:2 Cl-PFESA       | C <sub>8</sub> HClF <sub>16</sub> O <sub>4</sub> S             | Wellington Laboratories | 98%    |
| 3,3,4,4,5,5,6,6,7,7,8,8,8-tidecafluorooctanesulphonic acid                                         | 6:2 FTS            | C <sub>8</sub> H <sub>5</sub> F <sub>13</sub> O <sub>3</sub> S | Wellington Laboratories | 98%    |
| 2-perfluorooctyl ethanoic acid                                                                     | 8:2 FTA            | C <sub>10</sub> H <sub>3</sub> F <sub>17</sub> O <sub>2</sub>  | Wellington Laboratories | 98%    |
| 2-perfluorodecyl ethanoic acid                                                                     | 10:2 FTA           | C <sub>12</sub> H <sub>3</sub> F <sub>21</sub> O <sub>2</sub>  | Wellington Laboratories | 98%    |
| 2,2,3,3,4,4,5,5,6,6,7,7-dodecafluoroheptanoic acid                                                 | 7-H-PFHpA          | C <sub>7</sub> H <sub>2</sub> F <sub>12</sub> O <sub>2</sub>   | Fluorochem              | 98%    |

## **Section 2. Sample Preparation.**

Sample preparation of quartz fiber filter containing atmospheric particulate matter used our method previous study.<sup>1</sup> Each filter sample was placed into a 15mL polypropylene centrifuge tube separately. Each sample will be subjected to four cycles of 10 minutes ultrasonic extractions in a 40 °C water bath with 5mL, 5mL, 5mL and 3mL of methanol, respectively. The samples were centrifuged at 5000 rpm for five minutes after each cycle of ultrasonic extraction and the four extracted supernatants for one sample were combined in a 15mL polypropylene centrifuge tube.

Liquid samples collected by CMS were enriched through the sample preparation method in our previous study of water samples.<sup>2</sup> Each sample was enriched by solid phase extraction (SPE) using Oasis MAX cartridge (6 cc, 500 mg, Waters, Ireland), Oasis MCX cartridge (6 cc, 500 mg, Waters, Ireland) and Oasis HLB cartridge (6 cc, 500 mg, Waters, Ireland) sequentially. Precondition and elution solution for each cartridge are listed in **Table S2**. The eluent is collected in a 15mL polypropylene centrifuge tube for concentration under nitrogen and the eluents of the three cartridges for the same sample were combined in one 15mL polypropylene centrifuge tube.

All the ultrasonic extract and SPE eluent were reduced to a volume of 1 mL by evaporation under a gentle stream of nitrogen. The final concentrated extract was passed through a polypropylene-membrane syringe filter (Acrodisc GHP, 13 mm, 0.2  $\mu$ m, Waters) and transferred into a polypropylene vial for instrumental analysis.

**Table S2.** The Specification, precondition and elution solution of SPE cartridges.

| SPE cartridge | Specification | Precondition solution                                                 | Elution solution                             |
|---------------|---------------|-----------------------------------------------------------------------|----------------------------------------------|
| Oasis MAX     | 6 cc, 500 mg  | 10mL 2% NH <sub>4</sub> OH in methanol<br>10mL methanol<br>10mL water | 10mL 2%<br>HCOOH in<br>methanol              |
| Oasis MCX     | 6 cc, 500 mg  | 10mL 2% HCOOH in methanol<br>10mL methanol<br>10mL water              | 10mL 2%<br>NH <sub>4</sub> OH in<br>methanol |
| Oasis HLB     | 6 cc, 500 mg  | 10mL n-hexane<br>10mL dichloromethane<br>10mL methanol<br>10mL water  | 10 mL methanol                               |

### Section 3. UPLC-HRMS Analysis.

UPLC-HRMS Analysis for non-target screening was performed on ultra-performance liquid chromatography (UPLC; UltiMate 3000 Series, Thermo Fisher Scientific, Bremen, Germany) coupled with a high-resolution orbitrap mass spectrometer (Q Exactive Focus, Thermo Fisher Scientific, Bremen, Germany) with an electrospray ionization (ESI) source operating in negative ion mode. Sample separation used a C18 column (ACQUITY UPLC BEH C18, 1.7 $\mu$ m, 2.1 $\times$ 150mm, Waters, Ireland) kept at 40 °C. The mobile phases used were A: 2 mmol ammonium acetate, 5% methanol in water and B: methanol with the flow rate of 0.3 L/min. Mobile phase gradient elution conditions are shown in **Table S3**. The injection volume was 10  $\mu$ L. The parameters of the ion source were: spray voltage, 2500 V; capillary temperature, 320 °C; sheath gas, 48; aux gas, 11; spare gas, 2. The Q Exactive Focus was operated in Full MS combined with Discovery mode data dependent MS/MS (dd MS<sup>2</sup>). The resolution of Full MS is 70000 with the mass range of m/z 80 to 1000 and the resolution of dd MS<sup>2</sup> is 17500 with fixed first mass of 50 m/z. The other parameters were: nce, 20, 35, 50; AGC target, 5e4; loop count, 3.



**Table S3.** Mobile phase gradient elution condition.

| Time / min | % A<br>(2 mmol ammonium acetate<br>5% methanol in water) | % B<br>(methanol) |
|------------|----------------------------------------------------------|-------------------|
| 0          | 100                                                      | 0                 |
| 1          | 100                                                      | 0                 |
| 9          | 75                                                       | 25                |
| 18         | 50                                                       | 50                |
| 28         | 25                                                       | 75                |
| 39         | 0                                                        | 100               |
| 48         | 0                                                        | 100               |
| 48.1       | 100                                                      | 0                 |
| 55         | 100                                                      | 0                 |

**Table S4.** The procedural recovery (20 µg L<sup>-1</sup>) and the sensitivity of UPLC-HRMS analysis with known PFASs standards.

| Analyte | Theoretical mass / Da | 1 µg L <sup>-1</sup> |                        |             |             | 5 µg L <sup>-1</sup> |                        |             |             | Procedural recovery (n=3) / Mean(S.D.) |               |
|---------|-----------------------|----------------------|------------------------|-------------|-------------|----------------------|------------------------|-------------|-------------|----------------------------------------|---------------|
|         |                       | RT / min             | Experimental mass / Da | Error / mDa | Error / ppm | RT / min             | Experimental mass / Da | Error / mDa | Error / ppm | Particulate Matter                     | Gaseous Phase |
| PFBS    | 298.94299             | 17.22                | 298.94312              | 0.13        | 0.43        | 17.12                | 298.94305              | 0.06        | 0.20        | 102.1%(0.03)                           | 116.4%(0.01)  |
| PFHxS   | 398.93660             | 23.87                | 398.93661              | 0.01        | 0.03        | 23.78                | 398.93658              | -0.02       | -0.05       | 101.3%(0.07)                           | 90.4%(0.04)   |
| PFOS    | 498.93022             | 27.83                | 498.93036              | 0.14        | 0.28        | 27.75                | 498.93030              | 0.08        | 0.16        | 103.1%(0.04)                           | 94.5%(0.20)   |
| PFPeA   | 262.97601             | 15.47                | 262.97620              | 0.19        | 0.72        | 15.41                | 262.97614              | 0.13        | 0.49        | 104.3%(0.06)                           | 94.9%(0.02)   |
| PFHxA   | 312.97281             | 20.29                | 312.97308              | 0.27        | 0.86        | 20.29                | 312.97296              | 0.15        | 0.48        | 85.6%(0.14)                            | 94.5%(0.06)   |
| PFHpA   | 362.96962             | 23.49                | 362.96985              | 0.23        | 0.63        | 23.41                | 362.96991              | 0.29        | 0.80        | 101.9%(0.06)                           | 102.4%(0.06)  |
| PFOA    | 412.96643             | 25.85                | 412.96671              | 0.28        | 0.68        | 25.78                | 412.96655              | 0.12        | 0.29        | 102.8%(0.05)                           | 100.2%(0.10)  |
| PFNA    | 462.96323             | 27.73                | 462.96375              | 0.52        | 1.12        | 27.67                | 462.96338              | 0.15        | 0.32        | 102.7%(0.04)                           | 102.4%(0.07)  |
| PFDA    | 512.96004             | 29.29                | 512.96002              | -0.02       | -0.04       | 29.24                | 512.95990              | -0.14       | -0.27       | 107.1%(0.03)                           | 100.1%(0.18)  |
| PFUnDA  | 562.95685             | 30.58                | 562.95721              | 0.36        | 0.64        | 30.56                | 562.95709              | 0.24        | 0.43        | 110.1%(0.05)                           | 99.5%(0.29)   |
| PFDoDA  | 612.95365             | 31.77                | 612.95428              | 0.63        | 1.03        | 31.72                | 612.95404              | 0.39        | 0.64        | 135.9%(0.09)                           | 80.1%(0.10)   |
| PFTTrDA | 662.95046             | 32.78                | 662.95087              | 0.41        | 0.62        | 32.72                | 662.95099              | 0.53        | 0.80        | 139.7%(0.11)                           | 74.5%(0.04)   |
| PFTeDA  | 712.94726             | 33.66                | 712.94812              | 0.86        | 1.21        | 33.61                | 712.94781              | 0.55        | 0.77        | 111.1%(0.36)                           | 49.8%(0.02)   |

#### **Section 4. Non-target Screening and Identification of PFASs.**

The peak picking process of raw data is implemented by Compound Discoverer 3.0 (Thermo Fisher Scientific). The workflow composed of Input Files, Select Spectra, Align Retention Time, Detect Compounds, Group Compounds and Assign Compound Annotations, successively. Detailed parameters are Mass Tolerance 5 ppm, Maximum Shift 2 min, Intensity Tolerance 30%, S/N threshold 3, Min. Peak Intensity 10000, Max. Peak Width 0.5 min, Min. # Scans per Peak 5, Min. # Isotopes 2 and RT Tolerance 0.2 min.

PFASs homologues were found from peaks picked above using MATLAB script for PFAS Homologue Analysis described in our previous studies.<sup>1</sup> In this script, the input data was the peak list including exact mass and retention time, and the output result was the homologue candidate list. The mass difference of any two peaks was calculated during the running of script. The PFASs homologues were identified by the mass difference of 49.99681 Da (CF<sub>2</sub>, mass error < 5ppm) among the exact mass of peaks.

The PFASs homologues were screened by database firstly for identification. The database includes the laboratory's existing standards, the PFASs we have identified in previous studies<sup>1, 2</sup> and the PFASs with MS/MS spectrum information in the Norman database<sup>3</sup>. The database screening was using TraceFinder 4.1 General Quan (Thermo Fisher Scientific). PFASs information data including name, parent ion and product ion was imported into TraceFinder as Compound Database by CSV format. A target

screening method was used to screen the PFASs in created Compound Database with Mass Precision 5, S/N Ratio Threshold 3 and Mass Tolerance 5 ppm for Peaks, Intensity Threshold 1000 and Mass Tolerance 5 ppm for Fragment Ions.

For the PFASs homologues that not matched database, molecular formula and MS/MS fragments were calculated by Compound Discoverer 3.0 (function Predict Compositions) and Qual Browser (Thermo Fisher Scientific). The elements setting included C (3-50), H (0-50), F (0-50), O (0-8), N (0-4), P (0-4), S (0-4), Cl (0-2). The mass tolerance was 5 ppm for parent ion and 5 mDa for fragments.

With Sirius and CSI:FingerID, the relationship of fragmentation and the formula of fragments were predicted based on the MS/MS spectra, which could assist identification of structure. The confidence of the identification results is based on previous study.<sup>4</sup> Briefly, Level 1: confirmed structure by reference standard; Level 2a: probable structure matching literature or library spectrum data; Level 2b: probable structure with diagnostic evidence but no standard or literature information is available for confirmation; Level 3: tentative candidate(s) with evidence existing for possible structure(s), but insufficient information for one exact structure only; Level 4: unequivocal molecular formula and Level 5: exact mass.

**Table S5.** The identified PFASs with level 4 or above. The numbers in the “Particulate Matter” and “Gaseous Phase” show the distribution ratio in each phase and were converted by chromatographic peak area.

| Class                | Serial Number | Formula     | Level | Theoretical Molecular Weight | Mass Error /ppm | RT /min | RT delta /min | Particulate Matter |                |               |             | Gaseous Phase |
|----------------------|---------------|-------------|-------|------------------------------|-----------------|---------|---------------|--------------------|----------------|---------------|-------------|---------------|
|                      |               |             |       |                              |                 |         |               | > 10 $\mu$ m       | 10-2.5 $\mu$ m | 2.5-1 $\mu$ m | < 1 $\mu$ m |               |
| Class 1<br>PFCAs     | A01           | C4HF7O2     | 2     | 213.98648                    | 0.30~2.42       | 9.06    |               | 0.40               | 0.31           |               | 0.29        |               |
|                      | A02           | C5HF9O2     | 1     | 263.98328                    | 0.01~0.82       | 15.08   | 0.09~0.27     |                    |                |               | 0.48        | 0.52          |
|                      | A03           | C6HF11O2    | 1     | 313.98009                    | 0.38~2.53       | 19.82   | 0.00~0.22     | 0.06               | 0.08           |               | 0.70        | 0.16          |
|                      | A04           | C7HF13O2    | 1     | 363.97690                    | 0.04~2.40       | 22.88   | 0.09~0.15     | 0.11               | 0.09           | 0.07          | 0.67        | 0.06          |
|                      | A05           | C8HF15O2    | 1     | 413.97370                    | 0.29~1.78       | 25.31   | 0.02~0.15     | 0.05               | 0.18           | 0.17          | 0.50        | 0.11          |
|                      | A06           | C9HF17O2    | 1     | 463.97051                    | 0.26~1.51       | 27.22   | 0.00~0.05     | 0.29               | 0.12           | 0.19          | 0.10        | 0.31          |
|                      | A07           | C10HF19O2   | 1     | 513.96732                    | 0.04~0.08       | 28.83   | 0.03~0.06     | 0.26               |                | 0.23          |             | 0.51          |
|                      | A08           | C12HF23O2   | 1     | 613.96093                    | 1.03~1.24       | 31.35   | 0.03~0.06     | 0.61               |                |               |             | 0.39          |
| Class 2<br>PFSAs     | B01           | C6HF13O3S   | 1     | 399.94388                    | 0.80~1.77       | 23.28   | 0.11~0.19     | 0.06               | 0.58           | 0.18          | 0.18        |               |
|                      | B02           | C8HF17O3S   | 1     | 499.93749                    | 0.09~2.39       | 27.30   | 0.08~0.20     |                    | 0.33           | 0.67          |             |               |
| Class 3<br>n:2 FTSs  | C01           | C8H5F13O3S  | 1     | 427.97518                    | 0.05~1.35       | 25.18   | 0.06~0.22     |                    | 0.96           | 0.04          |             |               |
| Class 4<br>Cl-PFESAs | D01           | C8HClF16O4S | 1     | 531.90286                    | 0.8~1.29        | 29.29   | 0.11~0.16     | 0.03               | 0.41           | 0.42          | 0.14        |               |
| Class 5<br>diPAPs    | E01           | C16H9F26O4P | 2     | 789.98233                    | 0.44            | 33.04   |               | 1.00               |                |               |             |               |
|                      | E02           | C18H9F30O4P | 2     | 889.97594                    | 4.35            | 34.37   |               | 1.00               |                |               |             |               |
| Class 6<br>H-PFCAs   | F01           | C7H2F12O2   | 3     | 345.98632                    | 0.42~1.84       | 18.60   |               | 0.10               | 0.20           | 0.09          | 0.57        | 0.04          |
|                      | F02           | C8H2F14O2   | 3     | 395.98312                    | 0.18~1.83       | 21.42   |               | 0.13               | 0.32           | 0.08          | 0.45        | 0.02          |
|                      | F03           | C9H2F16O2   | 3     | 445.97993                    | 0.76~1.93       | 23.72   |               | 0.15               | 0.37           | 0.12          | 0.36        | 0.01          |

| Class                   | Serial Number | Formula      | Level | Theoretical Molecular Weight | Mass Error /ppm | RT /min | RT delta /min | Particulate Matter |          |         |       | Gaseous Phase |
|-------------------------|---------------|--------------|-------|------------------------------|-----------------|---------|---------------|--------------------|----------|---------|-------|---------------|
|                         |               |              |       |                              |                 |         |               | > 10µm             | 10-2.5µm | 2.5-1µm | < 1µm |               |
| Class 7<br>Cl-PFDEA     | F04           | C10H2F18O2   | 3     | 495.97674                    | 0.22~1.83       | 25.65   |               |                    | 0.75     |         | 0.25  |               |
|                         | F05           | C11H2F20O2   | 3     | 545.97354                    | 0.51~1.88       | 27.30   |               | 0.06               | 0.53     | 0.17    | 0.24  |               |
|                         | F06           | C12H2F22O2   | 3     | 595.97035                    | 0.52~1.75       | 28.72   |               | 0.11               | 0.41     | 0.23    | 0.25  | 0.0003        |
|                         | F07           | C13H2F24O2   | 3     | 645.96716                    | 0.79~2.49       | 29.93   |               | 0.09               | 0.45     | 0.26    | 0.20  |               |
|                         | F08           | C14H2F26O2   | 3     | 695.96396                    | 0.46~1.91       | 30.98   |               | 0.08               | 0.43     | 0.30    | 0.19  |               |
|                         | F09           | C15H2F28O2   | 3     | 745.96077                    | 0.98~1.80       | 31.92   |               | 0.10               | 0.46     | 0.29    | 0.14  | 0.0004        |
|                         | F10           | C16H2F30O2   | 3     | 795.95758                    | 0.79~2.74       | 32.76   |               | 0.09               | 0.48     | 0.33    | 0.10  |               |
|                         | F11           | C17H2F32O2   | 3     | 845.95438                    | 0.09~3.20       | 33.51   |               | 0.11               | 0.43     | 0.33    | 0.13  | 0.002         |
|                         | F12           | C19H2F36O2   | 3     | 945.94799                    | 0.79~1.90       | 34.81   |               | 0.10               | 0.46     | 0.33    | 0.11  |               |
|                         | G01           | C7HClF14O3   | 3     | 433.93907                    | 0.00~1.56       | 28.31   |               | 0.42               | 0.45     |         |       | 0.13          |
|                         | G02           | C8HClF16O3   | 3     | 483.93587                    | 0.23~1.51       | 29.49   |               | 0.24               | 0.44     | 0.03    |       | 0.29          |
|                         | G03           | C9HClF18O3   | 3     | 533.93268                    | 0.04~0.15       | 30.51   |               | 0.29               | 0.25     | 0.22    | 0.24  |               |
| Class 8<br>Cl-PFTrEA    | G04           | C10HClF20O3  | 3     | 583.92949                    | 0.26~2.35       | 31.18   |               | 0.21               |          |         |       | 0.79          |
|                         | G05           | C11HClF22O3  | 3     | 633.92629                    | 0.32~0.36       | 32.02   |               | 0.50               | 0.50     |         |       |               |
|                         | H01           | C9HClF18O4   | 3     | 549.92759                    | 0.05~2.07       | 30.72   |               |                    | 0.31     |         |       | 0.69          |
|                         | H02           | C10HClF20O4  | 3     | 599.92440                    | 0.02~0.90       | 31.46   |               |                    |          |         | 0.26  | 0.74          |
| Class 9<br>Cl-PFTeEA    | H03           | C11HClF22O4  | 3     | 649.92121                    | 0.02~0.59       | 32.22   |               | 0.52               | 0.18     | 0.13    | 0.16  |               |
|                         | H04           | C12HClF24O4  | 3     | 699.91801                    | 0.14~0.49       | 32.95   |               | 0.29               | 0.23     | 0.26    | 0.21  |               |
|                         | I01           | C11HClF22O5  | 3     | 665.91612                    | 0.23~0.32       | 32.46   |               | 0.14               | 0.15     | 0.14    | 0.15  | 0.42          |
|                         | I02           | C12HClF24O5  | 3     | 715.91293                    | 0.15~2.63       | 33.11   |               | 0.28               | 0.34     | 0.25    | 0.13  |               |
| Class 10<br>2Cl-PFTeECA | J01           | C12HCl2F21O6 | 3     | 709.88149                    | 0.25~1.28       | 31.72   |               | 0.80               |          |         | 0.20  |               |
|                         | J02           | C13HCl2F23O6 | 3     | 759.87829                    | 0.26~0.42       | 32.49   |               | 0.31               | 0.23     | 0.24    | 0.21  |               |

| Class                    | Serial Number | Formula      | Level | Theoretical Molecular Weight | Mass Error /ppm | RT /min | RT delta /min | Particulate Matter |          |         |       | Gaseous Phase |
|--------------------------|---------------|--------------|-------|------------------------------|-----------------|---------|---------------|--------------------|----------|---------|-------|---------------|
|                          |               |              |       |                              |                 |         |               | > 10µm             | 10-2.5µm | 2.5-1µm | < 1µm |               |
| Class 11<br>H,Cl-PFTeECA | K01           | C13H2ClF23O6 | 4     | 725.91727                    | 0.11~1.28       | 30.51   |               | 0.55               | 0.45     |         |       |               |
|                          | K02           | C16H2ClF29O6 | 4     | 875.90768                    | 0.26~0.42       | 32.98   |               | 0.24               | 0.20     | 0.42    | 0.14  |               |
| Class 12<br>n:2 FTAs     | L01           | C5H3F7O2     | 4     | 228.00213                    | 1.24~2.86       | 12.00   |               | 0.002              | 0.03     | 0.43    | 0.53  |               |
|                          | L02           | C8H3F13O2    | 4     | 377.99255                    | 0.00~1.59       | 23.50   |               |                    |          |         |       | 1.00          |
|                          | L03           | C10H3F17O2   | 1     | 477.98616                    | 1.34~4.15       | 23.77   | 0.28~0.34     | 0.10               | 0.28     | 0.06    | 0.48  | 0.07          |
|                          | L04           | C12H3F21O2   | 1     | 577.97977                    | 0.14            | 27.91   | 0.16          |                    | 1.00     |         |       |               |
| Class 13<br>1:n PFECAs   | M01           | C4HF7O3      | 4     | 229.98139                    | 4.89            | 6.82    |               |                    | 1.00     |         |       |               |
|                          | M02           | C5HF9O3      | 4     | 279.97820                    | 0.10~1.22       | 11.83   |               |                    |          |         |       | 1.00          |
|                          | M03           | C15HF29O3    | 4     | 779.94626                    | 0.92            | 29.01   |               | 1.00               |          |         |       |               |

**Table S6.** The CAS number, IUPAC name and SMILE for the identified PFASs with level 1 and level 2.

| Class     | Formula     | Level | CAS Number  | IUPAC Name                                                                                       | SMILE                                                                                |
|-----------|-------------|-------|-------------|--------------------------------------------------------------------------------------------------|--------------------------------------------------------------------------------------|
| Class 1   | C4HF7O2     | 2     | 375-22-4    | 2,2,3,3,4,4,4-heptafluorobutanoate                                                               | <chem>C(=O)(C(C(C(F)(F)F)(F)F)(F)F)O</chem>                                          |
| PFCAs     | C5HF9O2     | 1     | 2706-90-3   | 2,2,3,3,4,4,5,5,5-nonafluoropentanoate                                                           | <chem>C(=O)(C(C(C(C(F)(F)F)(F)F)(F)F)(F)F)O</chem>                                   |
|           | C6HF11O2    | 1     | 307-24-4    | 2,2,3,3,4,4,5,5,6,6,6-undecafluorohexanoic acid                                                  | <chem>C(=O)(C(C(C(C(C(F)(F)F)(F)F)(F)F)(F)F)(F)F)O</chem>                            |
|           | C7HF13O2    | 1     | 375-85-9    | 2,2,3,3,4,4,5,5,6,6,7,7,7-tridecafluoroheptanoate                                                | <chem>C(=O)(C(C(C(C(C(C(F)(F)F)(F)F)(F)F)(F)F)(F)F)(F)F)O</chem>                     |
|           | C8HF15O2    | 1     | 335-67-1    | 2,2,3,3,4,4,5,5,6,6,7,7,8,8,8-pentadecafluorooctanoic acid                                       | <chem>C(=O)(C(C(C(C(C(C(C(F)(F)F)(F)F)(F)F)(F)F)(F)F)(F)F)O</chem>                   |
|           | C9HF17O2    | 1     | 375-95-1    | 2,2,3,3,4,4,5,5,6,6,7,7,8,8,9,9,9-heptadecafluorononanoic acid                                   | <chem>C(=O)(C(C(C(C(C(C(C(C(F)(F)F)(F)F)(F)F)(F)F)(F)F)(F)F)O</chem>                 |
|           | C10HF19O2   | 1     | 335-76-2    | 2,2,3,3,4,4,5,5,6,6,7,7,8,8,9,9,10,10,10-nonadecafluorodecanoic acid                             | <chem>C(=O)(C(C(C(C(C(C(C(C(C(F)(F)F)(F)F)(F)F)(F)F)(F)F)(F)F)O</chem>               |
|           | C12HF23O2   | 1     | 307-55-1    | 2,2,3,3,4,4,5,5,6,6,7,7,8,8,9,9,10,10,11,11,12,12,12-tricosafafluorododecanoic acid              | <chem>C(=O)(C(C(C(C(C(C(C(C(C(C(C(F)(F)F)(F)F)(F)F)(F)F)(F)F)(F)F)(F)F)(F)F)O</chem> |
|           | C12HF23O2   | 1     | 307-55-1    | 2,2,3,3,4,4,5,5,6,6,7,7,8,8,9,9,10,10,11,11,12,12,12-tricosafafluorododecanoic acid              | <chem>C(=O)(C(C(C(C(C(C(C(C(C(C(C(F)(F)F)(F)F)(F)F)(F)F)(F)F)(F)F)(F)F)(F)F)O</chem> |
| Class 2   | C6HF13O3S   | 1     | 355-46-4    | 1,1,2,2,3,3,4,4,5,5,6,6,6-tridecafluorohexane-1-sulfonic acid                                    | <chem>C(C(C(C(F)(F)S(=O)(=O)O)(F)F)(F)F)(C(C(F)(F)F)(F)F)F</chem>                    |
|           | C8HF17O3S   | 1     | 1763-23-1   | 1,1,2,2,3,3,4,4,5,5,6,6,7,7,8,8,8-heptadecafluorooctane-1-sulfonic acid                          | <chem>C(C(C(C(C(F)(F)S(=O)(=O)O)(F)F)(F)F)(F)F)(C(C(C(F)(F)F)(F)F)(F)F)F</chem>      |
| Class 3   | C8H5F13O3S  | 1     | 27619-97-2  | 3,3,4,4,5,5,6,6,7,7,8,8,8-Tridecafluorooctane-1-sulfonic acid                                    | <chem>OS(=O)(=O)CCC(F)(F)C(F)(F)C(F)(F)C(F)(F)C(F)(F)C(F)(F)F</chem>                 |
| n:2 FTSs  | C8HClF16O4S | 1     | 756426-58-1 | 2-(6-chloro-1,1,2,2,3,3,4,4,5,5,6,6-dodecafluoro-hexoxy)-1,1,2,2-tetrafluoro-ethanesulfonic acid | <chem>C(C(C(C(F)(F)Cl)(F)F)(F)F)(C(C(OC(C(F)(F)S(=O)(=O)O)(F)F)(F)F)(F)F)F</chem>    |
| CI-PFESAs |             |       |             |                                                                                                  |                                                                                      |





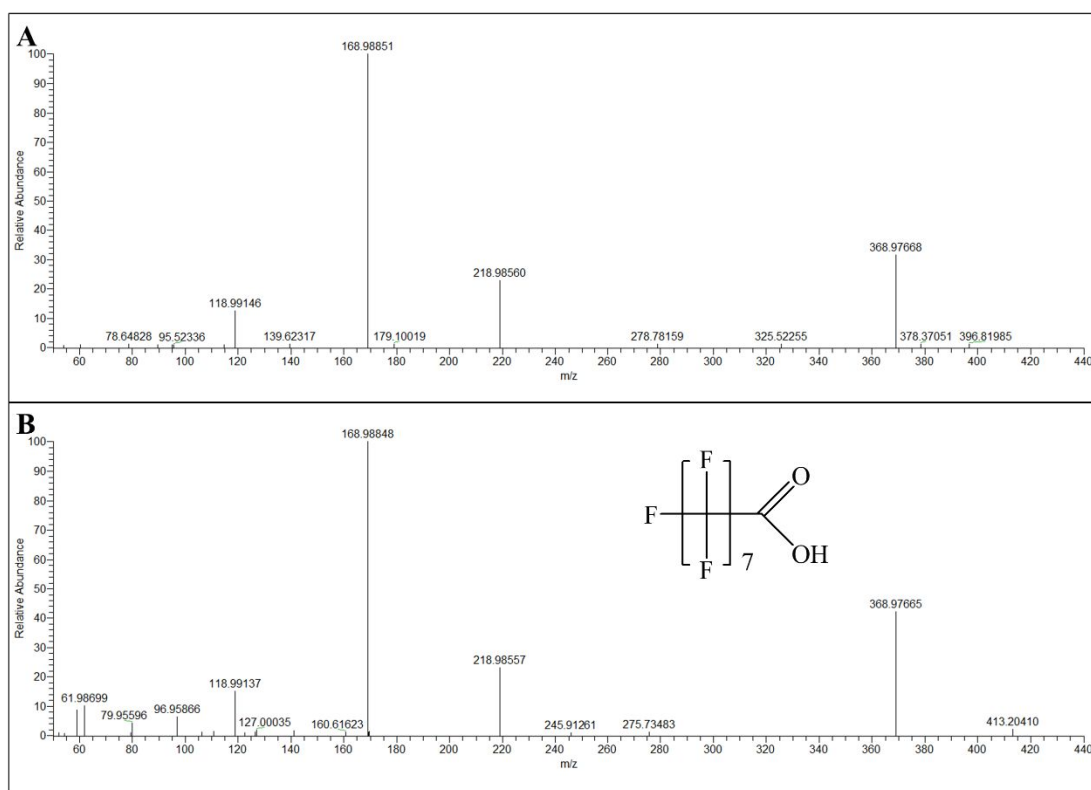

**Figure S1.** Identification of PFOA (m/z 412.96643). (A) MS/MS spectrum of PFOA in standard. (B) MS/MS spectrum of PFOA in sample.

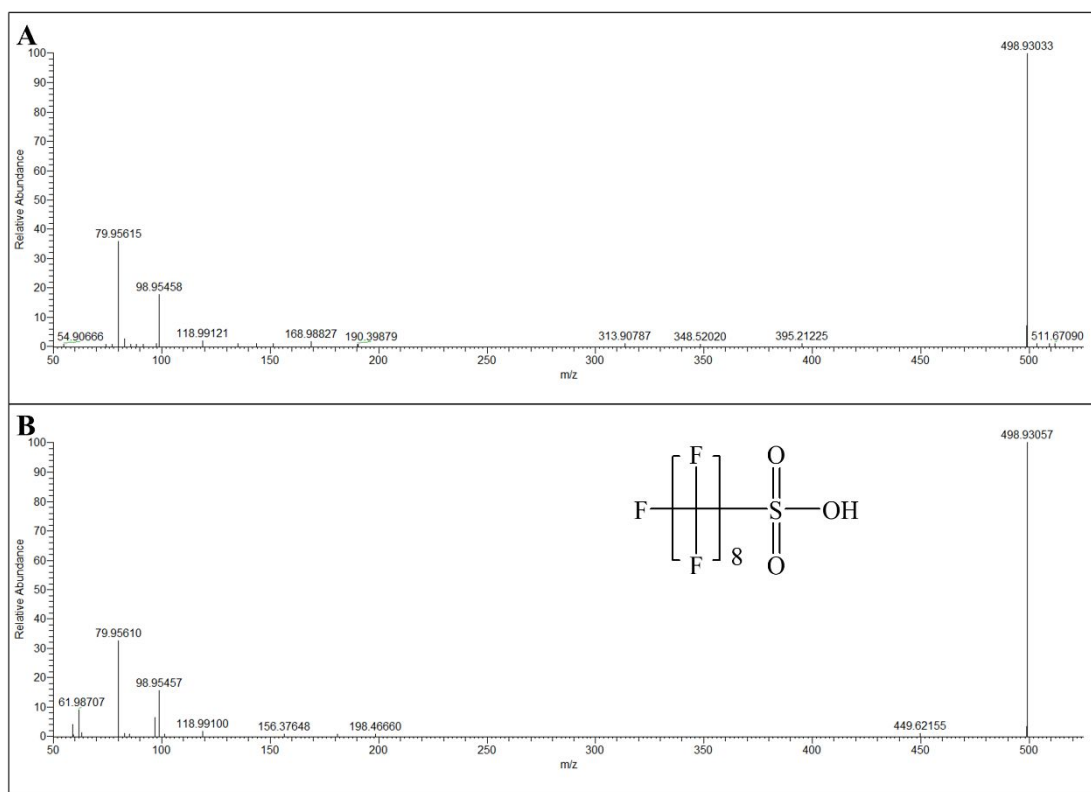

**Figure S2.** Identification of PFOS (m/z 498.93021). (A) MS/MS spectrum of PFOS in standard. (B) MS/MS spectrum of PFOS in sample.

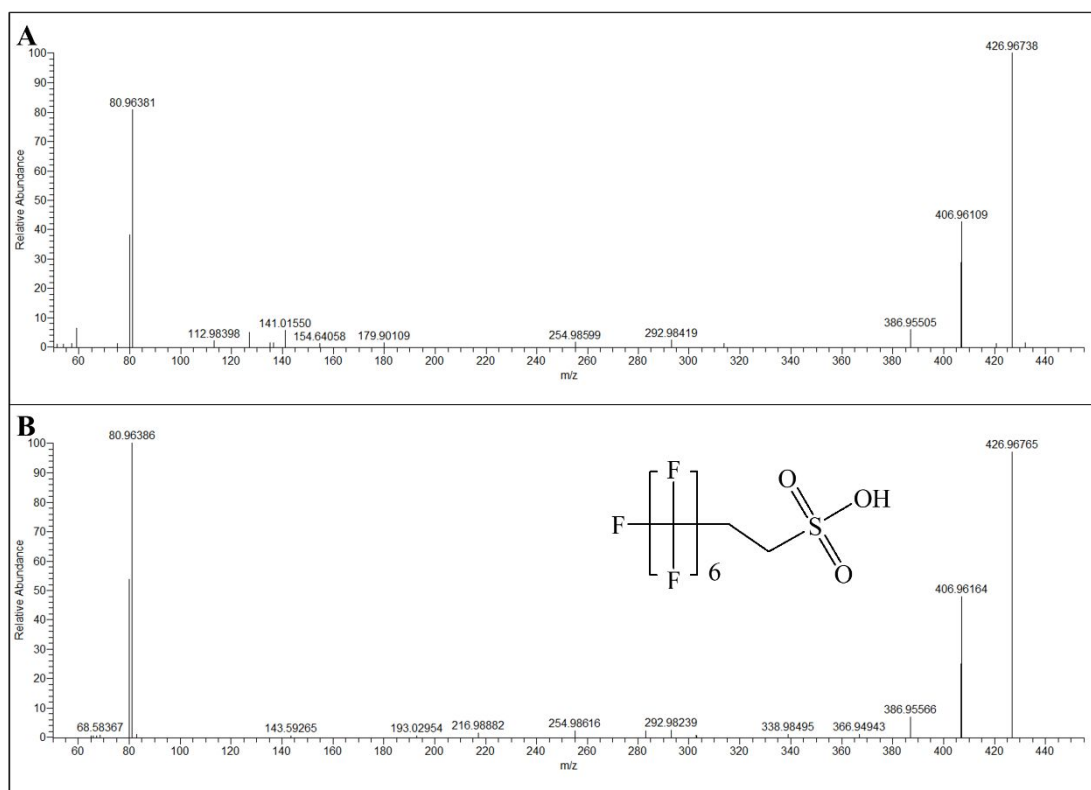

**Figure S3.** Identification of 6:2 FTS (m/z 426.96791). (A) MS/MS spectrum of 6:2 FTS in standard. (B) MS/MS spectrum of 6:2 FTS in sample.

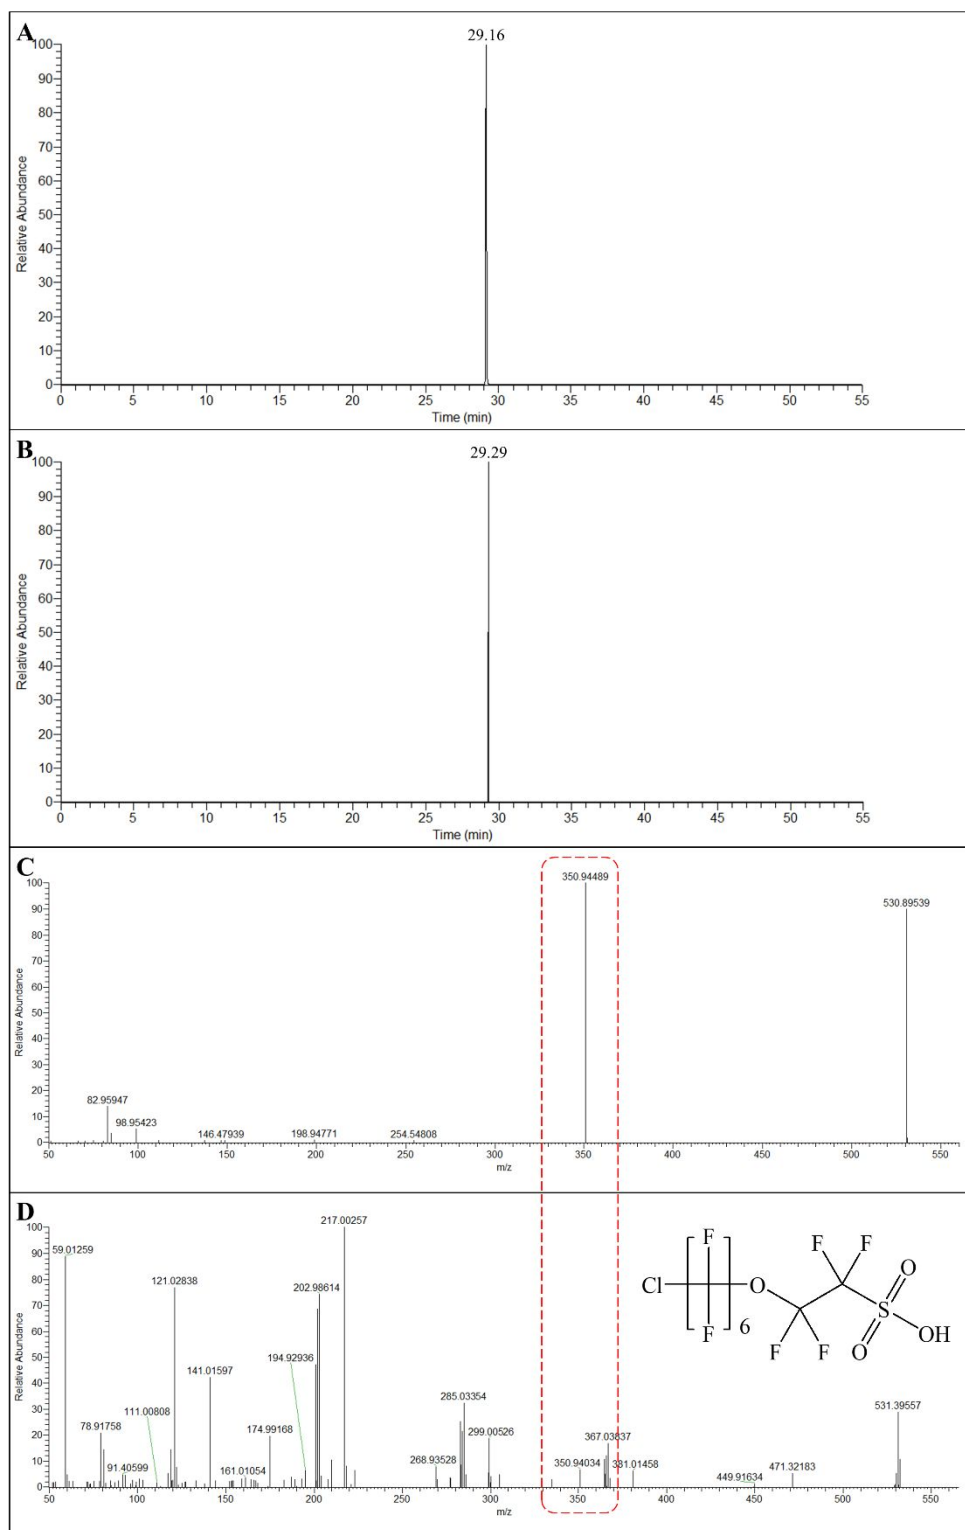

**Figure S4.** Identification of 6:2 Cl-PFESA (m/z 530.89558). (A) Extract ion chromatogram of 6:2 Cl-PFESA in standard. (B) Extract ion chromatogram of 6:2 Cl-

PFESA in sample. (C) MS/MS spectrum of 6:2 Cl-PFESA in standard. (D) MS/MS spectrum of 6:2 Cl-PFESA in sample.

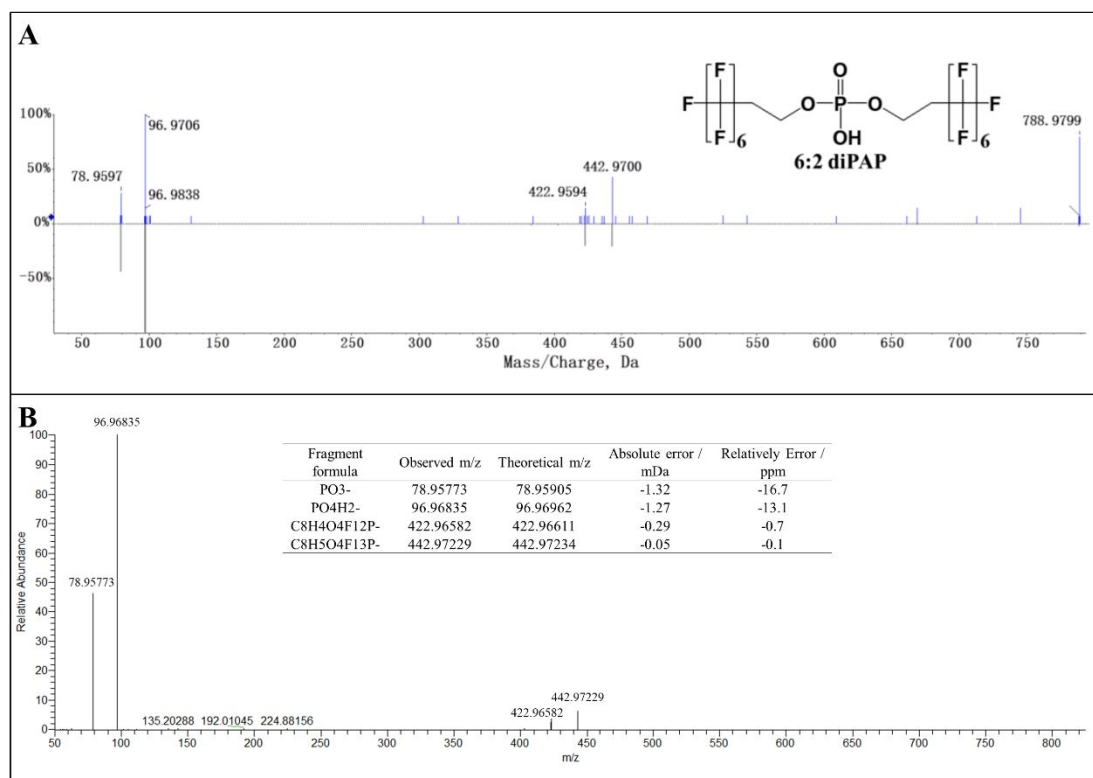

**Figure S5.** Identification of 6:2 diPAP (m/z 788.97505). (A) MS/MS spectrum of 6:2 diPAP in previous study confirmed by standard.<sup>1</sup> (B) MS/MS spectrum of 6:2 diPAP in sample.





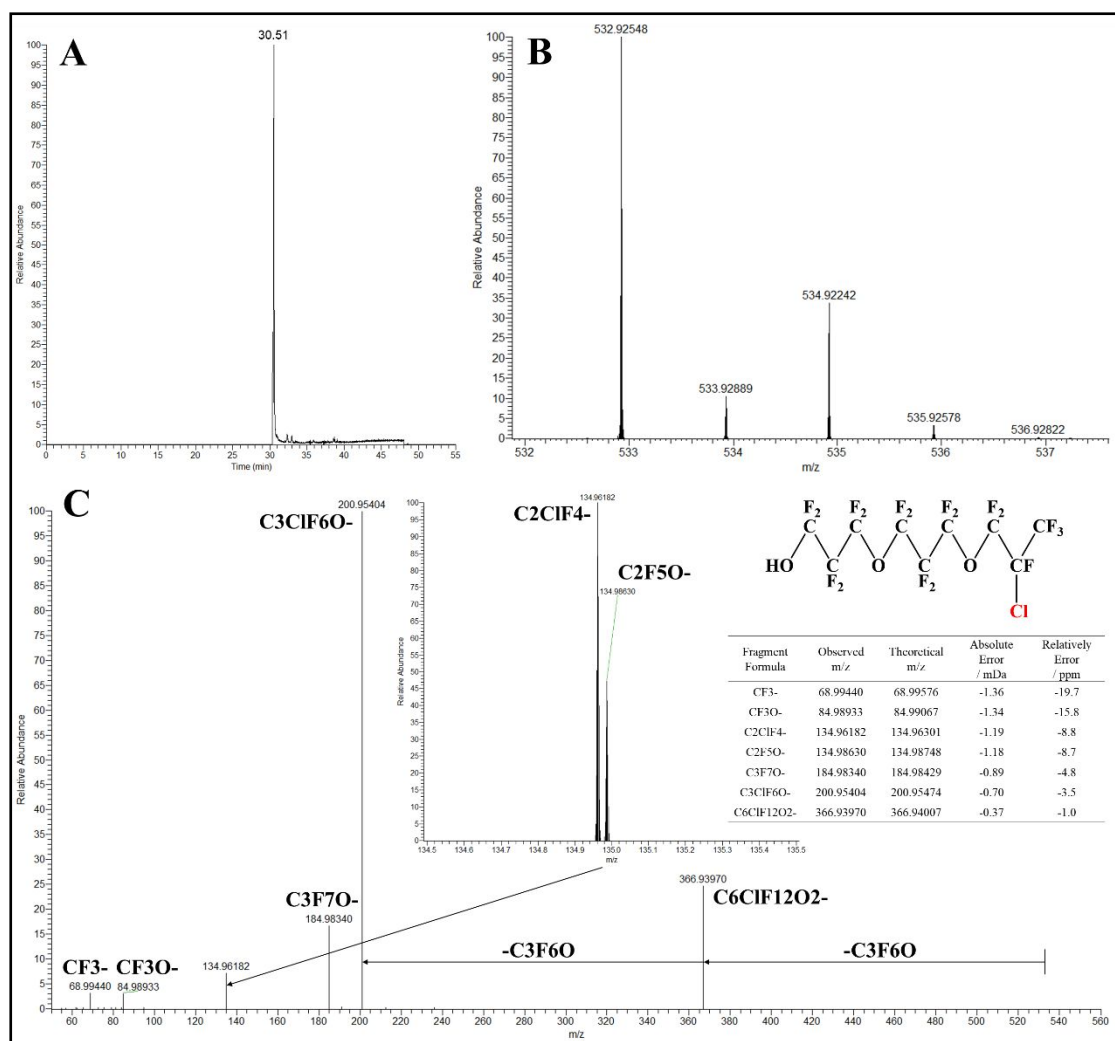

**Figure S7.** Identification of G03 ( $m/z$  532.92540) in Class 7. (A) Extract ion chromatogram of G03. (B) Isotope distribution of G03 in MS spectrum. (C) MS/MS spectrum of G03 with mass errors for the MS/MS fragments shown in the table.

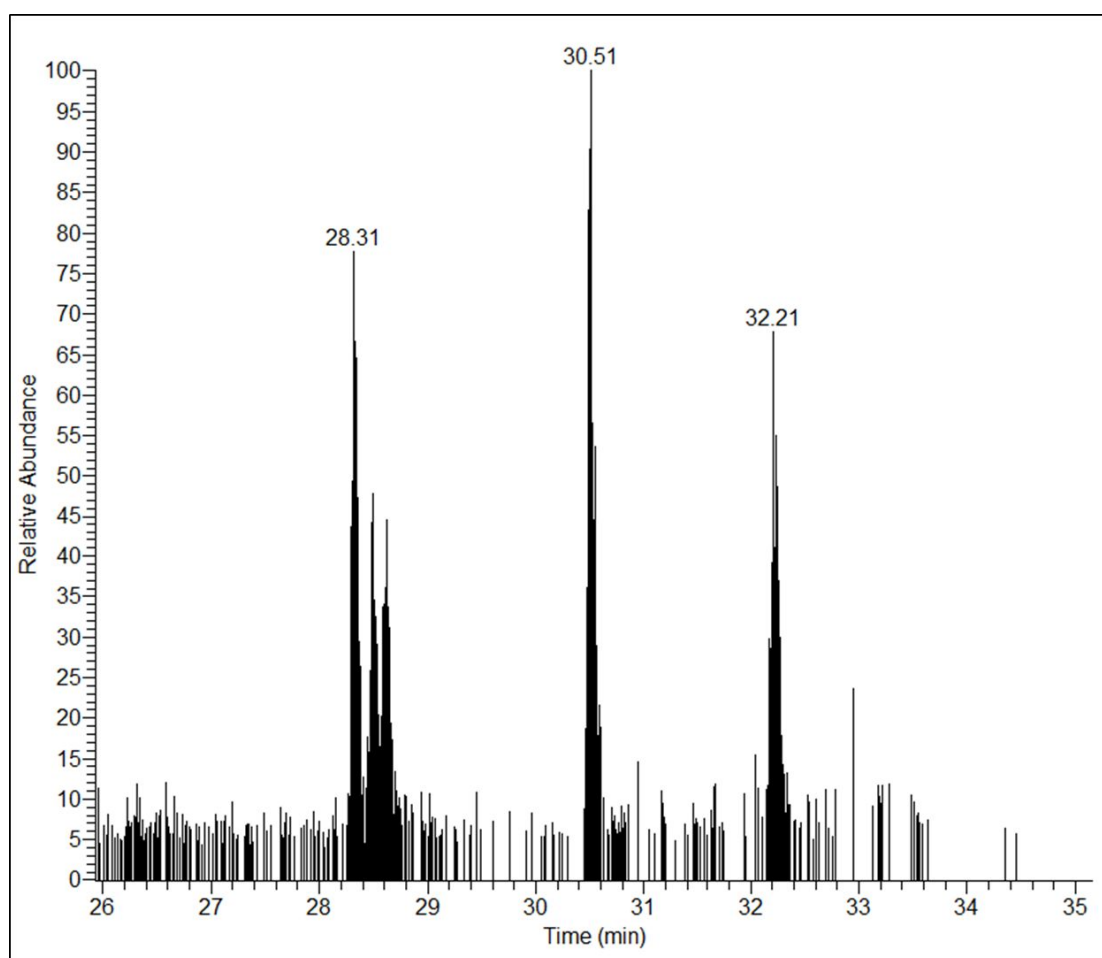

**Figure S8.** Extract ion chromatogram of G01 ( $m/z$  432.93179) in Class 7.

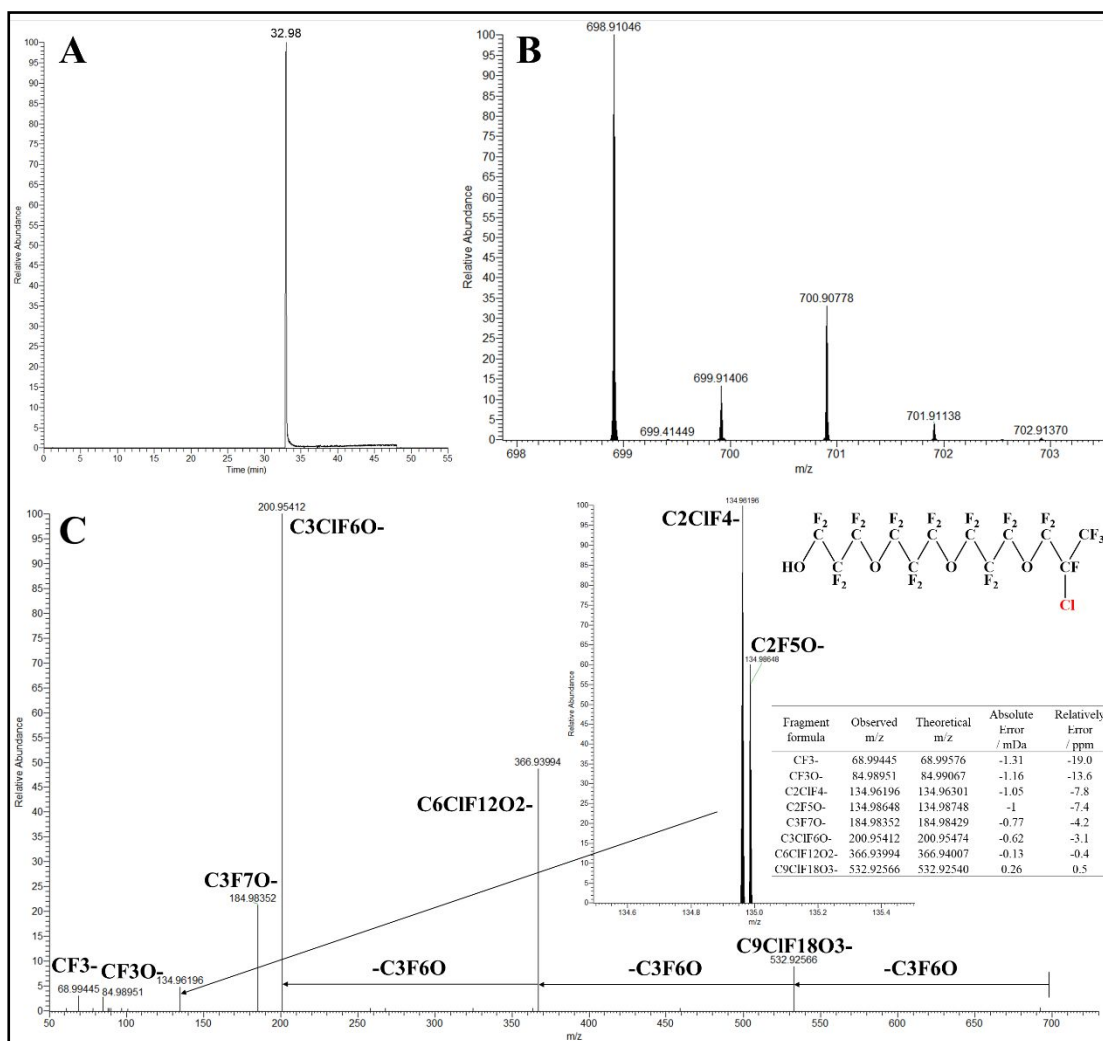

**Figure S9.** Identification of H04 ( $m/z$  698.91074) in Class 8. (A) Extract ion chromatogram of H04. (B) Isotope distribution of H04 in MS spectrum. (C) MS/MS spectrum of H04 with mass errors for the MS/MS fragments shown in the table.

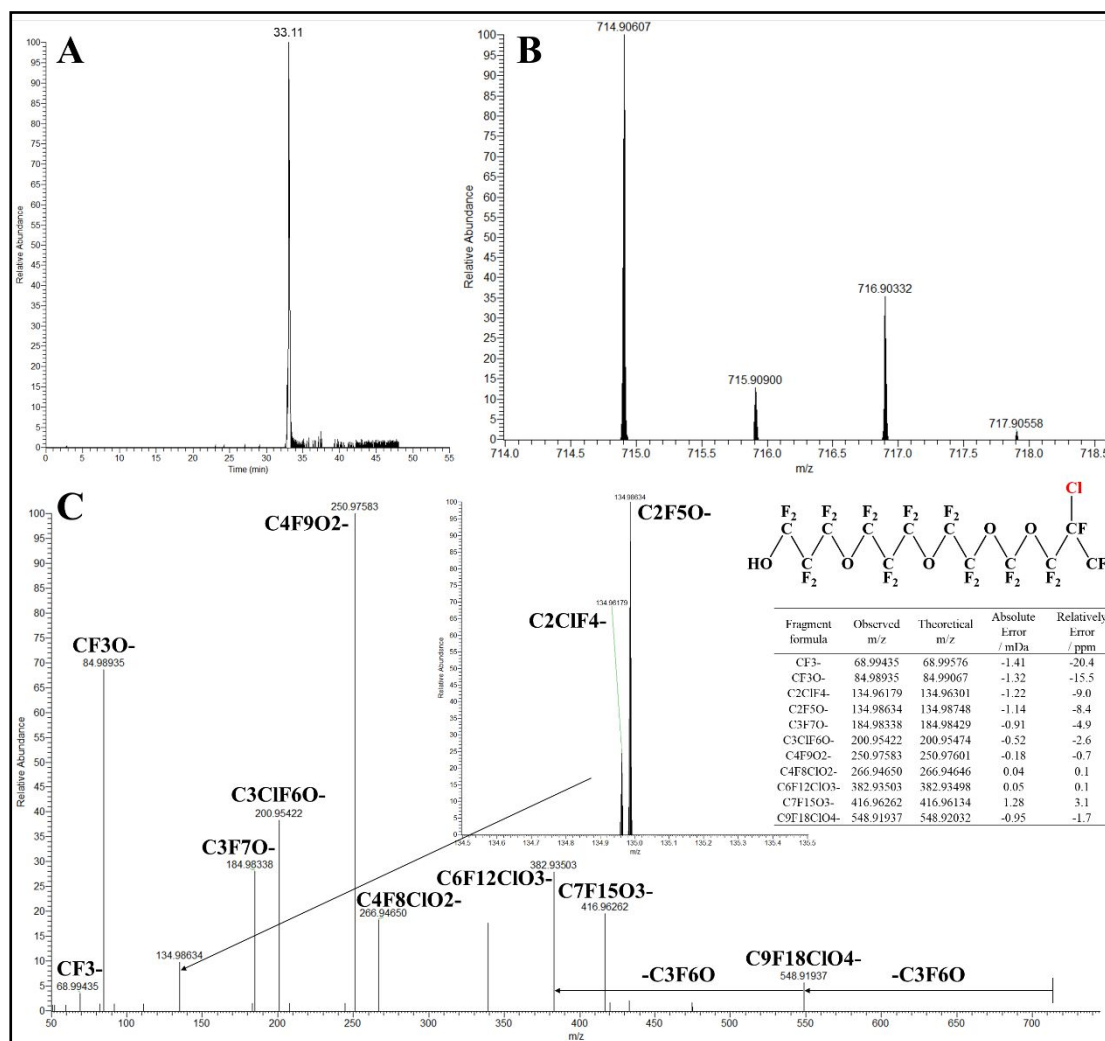

**Figure S10.** Identification of I02 ( $m/z$  714.90565) in Class 9. (A) Extract ion chromatogram of I02. (B) Isotope distribution of H04 in MS spectrum. (C) MS/MS spectrum of I02 with mass errors for the MS/MS fragments shown in the table.

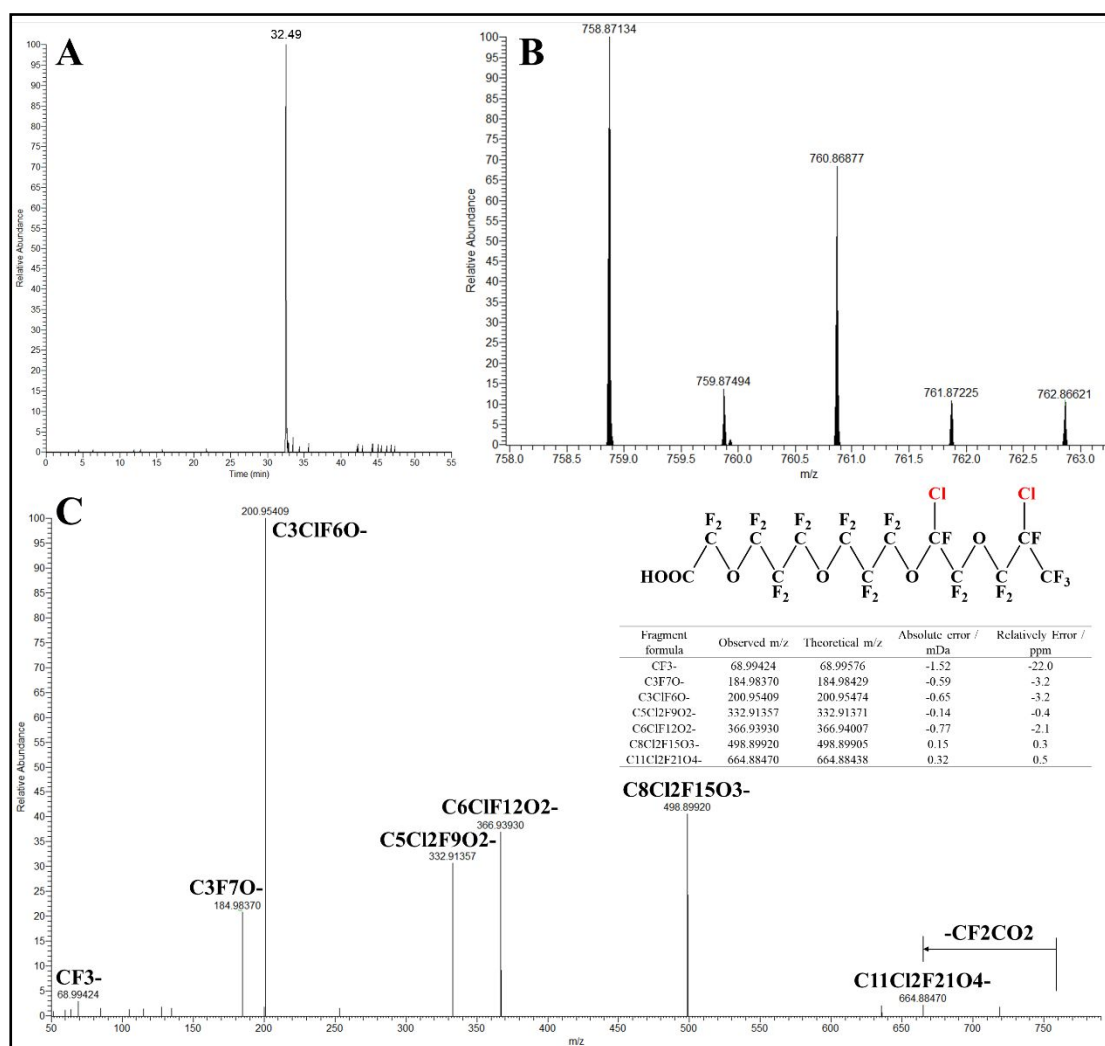

**Figure S11.** Identification of J02 ( $m/z$  758.87102) in Class 10. (A) Extract ion chromatogram of J02. (B) Isotope distribution of H04 in MS spectrum. (C) MS/MS spectrum of J02 with mass errors for the MS/MS fragments shown in the table.

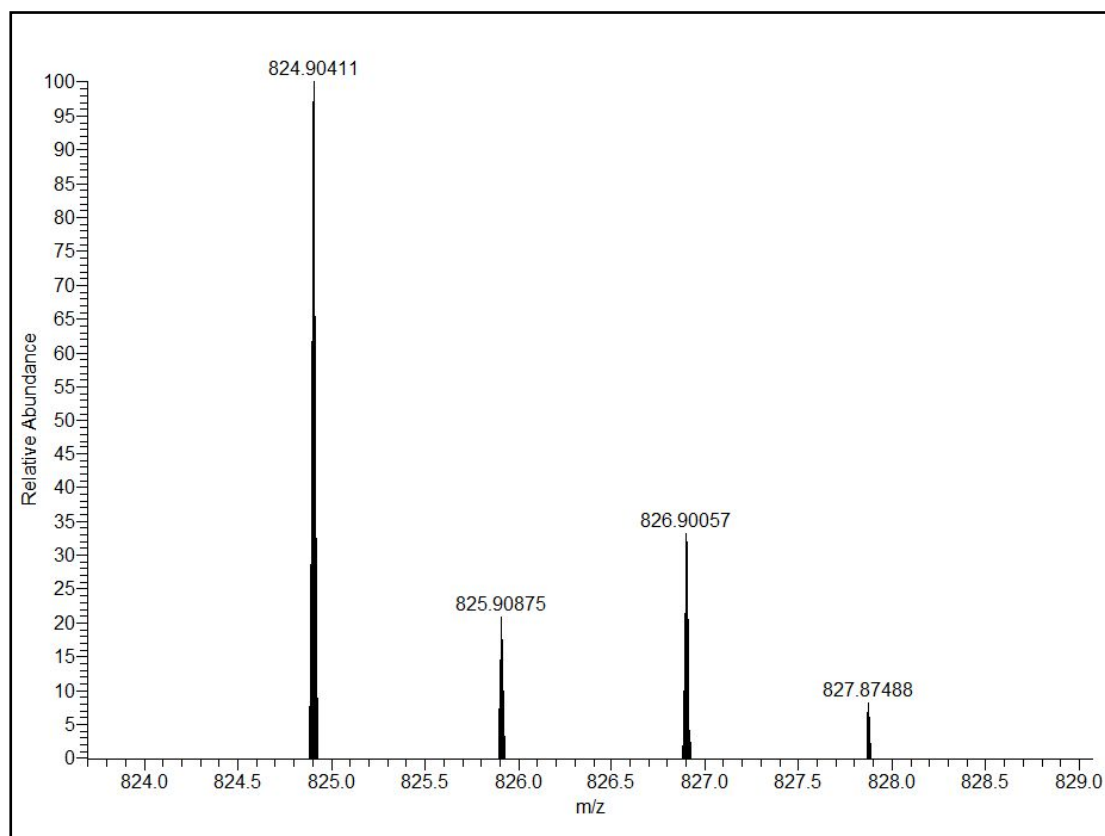

**Figure S12.** Isotope distribution of K02 (m/z 824.9036) in Class 11.

**Table S7.** Potential PFASs homologues found as Level 5. The numbers in the “Particulate Matter” and “Gaseous Phase” show the distribution ratio in each phase and were converted by chromatographic peak area.

| Homologue | Observe<br>Molecular<br>Weight | RT<br>/ min | Particulate Matter |                |               |             | Gaseous<br>Phase |
|-----------|--------------------------------|-------------|--------------------|----------------|---------------|-------------|------------------|
|           |                                |             | > 10 $\mu$ m       | 10-2.5 $\mu$ m | 2.5-1 $\mu$ m | < 1 $\mu$ m |                  |
| Class 14  | 208.03662                      | 6.72        |                    | 0.21           | 0.49          | 0.30        | 0.002            |
|           | 758.00050                      | 36.89       |                    | 0.29           |               | 0.29        | 0.42             |
|           | 807.99647                      | 37.51       |                    | 0.58           | 0.42          |             |                  |
| Class 15  | 222.08883                      | 14.57       |                    | 0.15           | 0.45          | 0.36        | 0.03             |
|           | 372.07811                      | 15.40       |                    |                |               |             | 1                |
| Class 16  | 132.07754                      | 3.63        |                    | 0.13           |               | 0.17        | 0.70             |
|           | 232.07074                      | 11.40       |                    |                |               |             | 1                |
|           | 332.06392                      | 33.84       | 0.42               |                | 0.19          |             | 0.40             |
| Class 17  | 136.09265                      | 7.29        |                    |                |               |             | 1                |
|           | 186.08847                      | 11.32       |                    |                |               |             | 1                |
|           | 386.07585                      | 29.35       |                    |                |               |             | 1                |
| Class 18  | 198.02702                      | 10.82       | 0.30               | 0.20           | 0.19          | 0.30        | 0.002            |
|           | 298.01903                      | 17.47       |                    |                |               |             | 1                |
|           | 398.01332                      | 23.00       |                    |                |               |             | 1                |
| Class 19  | 284.08726                      | 12.50       |                    | 0.02           | 0.97          | 0.01        | 0.002            |
| Class 20  | 244.13081                      | 10.27       |                    |                |               |             | 1                |
|           | 394.12230                      | 25.77       |                    |                |               |             | 1                |
|           | 594.10933                      | 28.95       | 1                  |                |               |             |                  |
| Class 21  | 238.12007                      | 16.55       |                    |                |               |             | 1                |
|           | 288.11317                      | 19.14       |                    |                |               |             | 1                |
|           | 388.10713                      | 19.36       |                    |                |               |             | 1                |
|           | 488.10011                      | 25.77       |                    |                |               |             | 1                |
|           | 588.09968                      | 28.22       |                    |                |               |             | 1                |
| Class 22  | 176.10397                      | 6.46        |                    | 0.05           | 0.23          | 0.15        | 0.57             |
|           | 326.09361                      | 12.04       |                    |                |               |             | 1                |
|           | 376.09160                      | 26.74       |                    |                |               |             | 1                |
| Class 23  | 128.08260                      | 11.34       |                    |                |               |             | 1                |
|           | 278.07249                      | 17.04       |                    |                |               |             | 1                |
|           | 378.06840                      | 26.01       |                    |                |               |             | 1                |
| Class 24  | 160.10901                      | 7.41        | 0.007              | 0.04           | 0.11          | 0.14        | 0.70             |
|           | 310.09868                      | 11.77       |                    |                |               |             | 1                |
|           | 410.09385                      | 24.05       |                    |                |               |             | 1                |
| Class 25  | 166.09851                      | 17.15       |                    |                |               |             | 1                |
|           | 316.08824                      | 18.56       |                    |                |               |             | 1                |
|           | 466.08064                      | 18.61       |                    |                |               |             | 1                |

| Homologue | Observe<br>Molecular<br>Weight | RT<br>/ min | Particulate Matter |          |         |       | Gaseous<br>Phase |
|-----------|--------------------------------|-------------|--------------------|----------|---------|-------|------------------|
|           |                                |             | > 10µm             | 10-2.5µm | 2.5-1µm | < 1µm |                  |
| Class 26  | 339.12562                      | 14.83       |                    |          |         |       | 1                |
|           | 389.12352                      | 18.96       |                    |          |         |       | 1                |
| Class 27  | 180.07770                      | 16.53       |                    | 0.48     | 0.52    |       |                  |
|           | 330.06755                      | 22.57       |                    |          |         |       | 1                |
|           | 480.05958                      | 23.54       |                    |          |         |       | 1                |
| Class 28  | 181.10945                      | 16.35       |                    |          |         |       | 1                |
|           | 331.09913                      | 17.77       |                    |          |         |       | 1                |
|           | 381.09672                      | 24.98       |                    |          |         |       | 1                |
| Class 29  | 343.09901                      | 10.89       |                    |          |         |       | 1                |
|           | 443.09422                      | 26.90       |                    |          |         |       | 1                |
| Class 30  | 214.11352                      | 19.90       |                    |          |         |       | 1                |
|           | 264.11101                      | 20.74       |                    |          |         |       | 1                |
|           | 314.10899                      | 25.93       |                    |          |         |       | 1                |
| Class 31  | 224.06804                      | 10.25       |                    |          |         |       | 1                |
|           | 324.06108                      | 10.62       |                    |          |         |       | 1                |
|           | 374.06093                      | 13.52       |                    |          |         |       | 1                |
| Class 32  | 242.10892                      | 12.40       |                    |          |         |       | 1                |
|           | 342.10390                      | 24.88       |                    |          |         |       | 1                |
| Class 33  | 244.02571                      | 2.04        |                    | 0.73     |         |       | 0.27             |
| Class 34  | 247.08423                      | 13.93       |                    |          |         |       | 1                |
|           | 347.07634                      | 20.57       |                    |          |         |       | 1                |
|           | 397.07408                      | 34.07       |                    |          |         |       | 1                |
| Class 35  | 250.12022                      | 16.72       | 0.12               | 0.03     | 0.23    | 0.01  | 0.62             |
|           | 400.10936                      | 19.89       |                    |          |         |       | 1                |
|           | 450.10740                      | 31.16       |                    |          |         |       | 1                |
| Class 36  | 268.13112                      | 15.57       |                    |          |         |       | 1                |
|           | 418.12022                      | 20.06       |                    |          |         |       | 1                |
|           | 618.11030                      | 23.80       |                    |          |         |       | 1                |
| Class 37  | 295.05156                      | 17.20       |                    |          |         |       | 1                |
|           | 345.04939                      | 21.74       |                    |          |         |       | 1                |
|           | 395.04323                      | 22.59       |                    |          |         |       | 1                |
| Class 38  | 378.12501                      | 23.92       |                    |          |         |       | 1                |
|           | 478.11717                      | 24.98       |                    |          |         |       | 1                |
|           | 578.11244                      | 31.82       |                    |          |         |       | 1                |



## References:

1. Yu, N.; Guo, H.; Yang, J.; Jin, L.; Wang, X.; Shi, W.; Zhang, X.; Yu, H.; Wei, S., Non-Target and Suspect Screening of Per- and Polyfluoroalkyl Substances in Airborne Particulate Matter in China. *Environ Sci Technol* **2018**, *52*, (15), 8205-8214.
2. Wang, Y.; Yu, N. Y.; Zhu, X. B.; Guo, H. W.; Jiang, J. G.; Wang, X. B.; Shi, W.; Wu, J. C.; Yu, H. X.; Wei, S., Suspect and Nontarget Screening of Per- and Polyfluoroalkyl Substances in Wastewater from a Fluorochemical Manufacturing Park. *Environ. Sci. Technol.* **2018**, *52*, (19), 11007-11016.
3. NORMAN NETWORK. List of PFAS reported in Non-Target HRMS Studies (Liu et al 2019). [http://www.norman-network.com/sites/default/files/files/suspectListExchange/080419Update/PFASNTRE V19\\_Liu\\_etal\\_17042019.xlsx](http://www.norman-network.com/sites/default/files/files/suspectListExchange/080419Update/PFASNTRE V19_Liu_etal_17042019.xlsx)
4. Schymanski, E. L.; Jeon, J.; Gulde, R.; Fenner, K.; Ruff, M.; Singer, H. P.; Hollender, J., Identifying small molecules via high resolution mass spectrometry: communicating confidence. *Environ Sci Technol* **2014**, *48*, (4), 2097-8.
5. Liu, Y. N.; Pereira, A. D.; Martin, J. W., Discovery of C-5-C-17 Poly- and Perfluoroalkyl Substances in Water by In-Line SPE-HPLC-Orbitrap with In-Source Fragmentation Flagging. *Anal. Chem.* **2015**, *87*, (8), 4260-4268.
